# Supplementary material for: Cost-Utility of Dalbavancin as a Treatment Option for Adult Patients with Acute Bacterial Skin and Skin Structure Infections (ABSSSI) in Canada
Source: Preprints.org preprint supplement (doi:10.20944/preprints202411.0514.v1), 2024-11-07
Supplement: Supplementary file 1 [file supplementary]

## Sheet: Instructions
				Cost calculator for Xydalba® – Instructions
				Xydalba is indicated for the treatment of adult patients with acute bacterial skin and skin structure infections (ABSSSI), caused by susceptible isolates of the following gram-positive microorganisms: Staphylococcus aureus (including methicillin-susceptible and methicillin-resistant strains), Streptococcus pyogenes, Streptococcus agalactiae, Streptococcus dysgalactiae, Streptococcus anginosus gro…
				This worksheet provides detailed instructions on how to use the calculator.
				Calculator navigation
				The Excel workbook uses macros, which must be enabled to use the navigation buttons.
				To advance to a different worksheet, click on the relevant button in the menu bar on the left portion of the screen.
				Changes to inputs
				Cells shaded in purple can be altered (see example below). When a new value is entered, the calculator will automatically update the results.
				Cell that can be changed:				Example
				White cells and cells shaded in grey contain formulas that cannot be altered because they are protected (examples below).
				Cells with formulas:				Example		Example
				There is a restore button on each of the worksheets that would restore the inputs (purple cells) of all the worksheets to their original value.
				Cost calculator assumptions
				The patient profiles, assumptions, and parameters included in the model were developed based on the opinions of consulted Canadian clinical experts.
				The calculator is calibrated for up to a maximum of 14 days of treatment, which roughly corresponds to the duration of antibiotic coverage provided by Xydalba.
				The costs are disaggregated, which allows for the consideration of inpatient and outpatient setting costs separately.
				For inpatient settings, the costs are calculated using the hospital perspective and include the following items: - Antibiotic utilisation in the inpatient setting - Catheter or a PICC line - Hospital stay - Hospital pharmacist, assistant technician, and nurse for treatment administration - In-hospital monitoring
				For outpatient settings, the costs are calculated using the public payer perspective (please confirm) and include the following items: - Antibiotic utilisation in the outpatient setting - Catheter or a PICC line - Nurse for treatment administration - Monitoring in the outpatient settings
				"Patient profile / Length of hospital stay" section
				In the first section, use the dropdown menu to select the relevant population or patient profile, which will determine length of stay. The table under the dropdown menu provides details regarding the source or assumption for that selection (see example below). When a different population is selected, the table contents are adjusted accordingly. The default length of stay value is based on a publi…
				As mentioned above, population selection has an impact on the length of hospital stay. The table below shows an example of the length of stay per treatment. Note that, in addition to the different patient profiles, the dropdown menu also contains the option "Customised length of stay values". When this option is selected, the second column of the table below becomes purple and the user can enter …
				"Antibiotic costs" section
				This section will calculate the total antibiotic cost for the inpatient stay.
				For the calculation of the total cost of Xydalba in both inpatient and outpatient settings, a dropdown menu allows the user to select the administration of Xydalba as a single dose of 1,500 mg or a dose of 1,000 mg followed by a second dose of 500 mg one week later. The administration costs are accounted for in both inpatient and outpatient settings and depend on the length of hospitalisation sel…
				For vancomycin, the dropdown menu allows the selection of 1,000 mg, 2,000 mg, or 3,000 mg per infusion. All other dosages will generate a warning message asking the user if they want to continue with these values. Clicking "yes" allows the use of a different value. The same applies to the ceftriaxone dropdown menu (1,000 mg or 2,000 mg). Linezolid does not contain a dropdown menu as the only dosa…
				The "Total inpatient treatment cost" then multiplies the total daily cost by the duration of IV treatment within the inpatient setting, which corresponds to the minimum value between the treatment duration and the hospital length of stay. If the IV treatment is longer than the hospital stay, the remaining cost of the treatment would be included in the "Total outpatient treatment cost".
				The model allows for a potential switch to oral treatment. As the total duration of the antibiotic treatment considered is 14 days, oral antibiotics would only be considered in cases where the length of IV treatment is shorter than the total length of antibiotic treatment. These costs would be incurred in the inpatient or outpatient settings depending on the relative length of hospitalisation.
				"Catheter or PICC line costs" section
				The calculator assumes that a catheter or PICC line will not be necessary for Xydalba. For the comparators, the calculator assumes that a catheter or PICC line will be used. However, the user can add a third "Other" option, if desired.
				The user should enter the proportion of utilisation for each method of administration in order to calculate a weighted average cost. The total proportion of utilisation should be 100%. If the total is not 100%, the "Total infusion cost" utilisation will be highlighted. This will not prevent the model from performing the calculation, but the user should suspect an error in the weighted average cos…
				The default model assumes that 100% of administration costs will be incurred in an inpatient setting, but a portion or the totality of these costs could also be captured in the outpatient setting by decreasing the parameter "Proportion of the cost incurred in the inpatient setting".
				"Hospital stay costs" section
				This section allows for the calculation of the cost of the hospital stay. The length of hospitalisation from the "Patient profile / Length of hospital stay" section is multiplied by the daily cost of hospitalisation for a patient with a skin infection.
				"Treatment administration costs, inpatient settings" section
				This section calculates the cost of pharmacists, assistant technicians, and nurses involved in inpatient antibiotic administration.
				The table "Minutes of work per administration" allows the user to enter the minutes per day spent by a pharmacist, assistant technician, and nurse for a given treatment. These minutes are converted into hours and multiplied by the hourly rate for these professionals to obtain the total cost calculated in the table below.
				"Treatment administration costs, outpatient settings" section
				This section calculates the cost of nurse administrating the IV antibiotic in an outpatient setting.
				The number of hours per infusion of each treatment is based on the respective product monographs and is converted into administration cost by multiplying the hours by a nurse hourly rate.
				"Monitoring costs" section
				This section calculates the cost of monitoring antibiotic treatment. The number of tests required weekly are entered in the "Weekly monitoring frequency" table and the cost of these tests are calculated and accounted for in the inpatient or outpatient settings depending on the length of treatment relative to the hospital length of stay.
				"Results" worksheet
				This worksheet summarises all the costs from previous sections. Costs are presented as disaggregated for inpatient and outpatient settings and as a combined cost.
				The default assumes the calculation of costs for one patient, but the "Number of patients to consider in the calculation" allows for the calculation to be performed on more than one patient with the same characteristics (i.e., length of treatment, length of hospitalisation, etc.)
				"Additional NIHB costs" worksheet
				This worksheet allows for the addition of costs that are specific to NIHB patients. It includes the following: - Patient medical evacuation transportation (i.e., MEDEVAC) - Caregiver cost, for carer accompanying patients (i.e., meal cost and accommodation cost)

## Sheet: Cost calculator
				Cost calculator for Xydalba® – Cost calculator
				Xydalba is indicated for the treatment of adult patients with acute bacterial skin and skin structure infections (ABSSSI), caused by susceptible isolates of the following gram-positive microorganisms: Staphylococcus aureus (including methicillin-susceptible and methicillin-resistant strains), Streptococcus pyogenes, Streptococcus agalactiae, Streptococcus dysgalactiae, Streptococcus anginosus gro…
				Patient profile / Length of hospital stay
				Select the relevant population scenario
									0
				Selected population scenario	Hospitalisation required for the length of antibiotic treatment
				Definition	A patient who could be discharged but has a high likelihood of non-adherence to outpatient treatment (e.g., homeless, PWID)
				Source / Assumption	Xydalba: no hospitalisation; Comparators: hospital length of stay is set equal to the length of antibiotic treatment
				The cost-calculator allows you to calculate in-patient or outpatient/ambulatory costs. Outpatient/ambulatory costs are based off the difference of the total treatment period (F14) and the length of hospitalization. All inputs are user modifable.
					Length of hospitalisation (days)
				Treatment	Population-based value	Customised value	Selected value
				Xydalba IV	0	0	0
				Vancomycin IV	14	7	14
				Linezolid IV	14	7	14
				Daptomycin	14	7	14
				Cefazolin IV	14	7	14
				Ceftriaxone IV	14	7	14
				Other	14		14
				Antibiotic costs
				Xydalba cost per mg	1.91433	Source: Paladin data on file
				Administration options for Xydalba
					Inpatient settings	Outpatient settings	Total treatment
				Xydalba dosage (in mg)	0	1500	1500
				Xydalba total cost ($)	0	2871.5	2871.5
				Total length of antibiotic treatment (Oral and IV combined, Days)	14	Please select a value between 1 and 14 days. This input is used to calculate the total antibiotic cost and also, the number of days in the outpatient setting, which would correspond to the total length of antibiotic treatment minus the length of hospitalisation for each treatment.
				Daily cost of selected comparators	Dose per administration (mg)	Number of administrations per day	Cost / mg ($)	Daily cost ($)	Length of IV treatment (Days)	Length of hospitalisation (Days)	Total inpatient treatment cost ($)1	Total outpatient treatment cost ($)2	Total treatment cost ($)
				Vancomycin IV	1000	2	0.018781	37.562	7	4.8	180.298	82.6364	262.934	Cost source: Québec RAMQ Liste des médicament, December 2023
				Linezolid IV	600	2	0.1479	177.48	7	14	1242.36	0	1242.36	Cost source: Ontario Drug Benefit Formulary, accessed on January 2024
				Cefazolin IV	1000	3	0.006	18	7	14	126	0	126	Cost source: Ontario Drug Benefit Formulary, accessed on January 2024
				Ceftriaxone IV	2000	1	0.01249	24.98	7	14	174.86	0	174.86	Cost source: Ontario Drug Benefit Formulary, accessed on January 2024
				Other	0	0	0	0	7	14	0	0	0
					Patient's weight (kg)	Daily dose (mg/kg)	Cost / mg ($)	Daily cost ($)	Length of IV treatment (Days)	Length of hospitalisation (Days)	Total inpatient IV treatment cost ($)3	Total outpatient IV treatment cost ($)4	Total treatment cost ($)
				Daptomycin	76	6	0.3247	148.063	7	14	1036.44	0	1036.44	Cost source: Ontario Drug Benefit Formulary, accessed on January 2024
				Cost of subsequent oral antibiotic	Daily cost ($)	Assumption and references
				Oral antibiotic (weighted average)	4.31743	The cost of oral treatment is a weighted average of linezolid PO, clindamycin PO, cephalexin PO, cloxacillin PO, sulfamethoxazole / trimethoprim PO, and amoxicillin / clavulanate potassium PO (weights are based on Canadian expert opinion). Source cost: Ontario Drug Benefit Formulary accessed on January 2024
				Post-IV oral antibiotic treatments	Inpatient length of oral treatment (Days)	Outpatient length of oral treatment (Days)	Total inpatient treatment cost ($)	Total outpatient treatment cost ($)	Total treatment cost ($)
				Post-vancomycin IV oral antibiotics	0	7	0	30.222	30.222
				Post-linezolid IV oral antibiotics	7	0	30.222	0	30.222
				Post-cefazolin IV oral antibiotics	7	0	30.222	0	30.222
				Post-ceftriaxone IV oral antibiotics	7	0	30.222	0	30.222
				Post-other IV oral antibiotics	7	0	30.222	0	30.222
				Post-daptomycin IV oral antibiotics	7	0	30.222	0	30.222
				1. The total inpatient IV treatment cost multiplies the daily cost with the length of IV treatment or the length of hospitalisation, whichever is the shortest.
				2. The total outpatient IV treatment cost multiplies the daily cost with the length of IV treatment in the outpatient settings, if any.
				3. The cost of subsequent inpatient oral antibiotic treatment is accounted for only in cases where patients are still hospitalised while on oral antibiotics.
				4. The cost of subsequent outpatient oral antibiotic treatment is accounted for only in cases the length of antibiotic treatment is greater than the length of hospitalisation and the length of IV treatment.
				Catheter or PICC line costs
				Cost of a catheter or PICC line for comparators		% of utilisation	Cost per utilisation ($)	Assumption and references
				PICC line		0.9	371.222	CADTH HTIS June 2008, https://www.cadth.ca/sites/default/files/pdf/htis/Peripherally%20Inserted%20Central%20Catheter%20(PICC)%20Stabilization%20Devices%20Clinical%20and%20Cost-Effectiveness.pdf; accessed on 02 January 2023; USD converted Ito CAD using exchange rate from Government of Canada, inflated to December 2023 using Statistic Canada CPI for Health care
				Catheter		0.1	33.25	RAMQ. MANUEL Rémunération à l’acte. Médecin spécialistes, accessed on January 2024
				Other (e.g., a pump)		0	0
				Total infusion cost		1	337.425	Note: the total proportion of utilisation must sum to 100% in order to properly calculate the total cost for infusion. If not, the total utilisation formatting will be highlighted.
				Proportion of the cost incured in the inpatient settings		1
				Total inpatient cost		337.425
				Total outpatient cost		0
				Antibiotics for which a catheter or a PICC line is used
				Xydalba IV
				Vancomycin IV
				Linezolid IV
				Daptomycin
				Cefazolin IV
				Ceftriaxone IV
				Other
				Hospital stay costs
				Cost of hospitalisation		Input	Assumption and references
				Daily cost of hospitalisation ($)		2598.94	CIHI Patient Cost estimator (2021-2022), inflated to December 2023
				Treatment	Length of stay (Days)	Hospital cost ($)
				Xydalba IV	0	0
				Vancomycin IV	14	36385.1
				Linezolid IV	14	36385.1
				Daptomycin	14	36385.1
				Cefazolin IV	14	36385.1
				Ceftriaxone IV	14	36385.1
				Other	14	36385.1
				Source or assumption for length of stay: Xydalba: no hospitalisation; Comparators: hospital length of stay is set equal to the length of antibiotic treatment
				Treatment administration costs, inpatient settings
				Hourly rate for a pharmacist ($)	62.696	Source: Pettigrew et al. 2012, adjusted to December 2023
				Hourly rate for a pharmacy assistant technician ($)	28.3168	Source: Pettigrew et al. 2012, adjusted to December 2023
				Hourly rate for a nurse ($)	42.5	Source: Statistics Canada 2018 data, inflated to December 2023
					Minutes spent daily for treatment administration
					Pharmacist		Assistant technician	Nurse time
				Treatment	1st day	Subsequent days	Per day	Per day of administration
				Xydalba IV	5	-	10	5	Pharmacist and assistant technician time: expert opinion; Nurse time: 5 minutes per administration was assumed
				Vancomycin IV	20	3.33333	20	10	Pharmacist: 20 minutes is considered at Day 1 and 10 minutes every three days converted into minutes per day for subsequent days (expert opinion); Assistant technician: 10 minutes per infusion x 2 infusions (expert opinion); Nurse: 5 minutes per administration was assumed
				Linezolid IV	10	1.42857	6	10	Pharmacist: 10 minutes for the first day (expert opinion) and 10 minutes per week in subsequent days; Assistant technician: 3 minutes per infusion (Pettigrew et al. 2012) x 2 infusions; Nurse time: 5 minutes per administration was assumed
				Daptomycin	10	1.42857	10	5	Pharmacist: 10 minutes at Day 1 (expert opinion) and 10 minutes per week converted into minutes per day for subsequent days; Assistant technician: same as Xydalba (expert opinion); Nurse time: 5 minutes per administration was assumed
				Cefazolin IV	5	0.714286	15	15	Pharmacist: 5 minutes at Day 1 and 5 minutes per week converted into minutes per day for subsequent days; Assistant technician: 5 minutes per administration (expert opinion); Nurse time: 5 minutes per administration was assumed
				Ceftriaxone IV	5	0.714286	5	5	Pharmacist: 5 minutes at Day 1 and 5 minutes per week converted into minutes per day for subsequent days; Assistant technician: 5 minutes per administration (expert opinion); Nurse time: 5 minutes per administration was assumed
				Other	0	0	0	0	Placeholder
					Costs per inpatient stay
				Treatment	Total pharmacist cost ($)	Total assistant technician cost ($)	Total nurse cost ($)	Total inpatient cost ($)
				Xydalba IV	0	0	0	0
				Vancomycin IV	34.1345	45.3069	34	113.441
				Linezolid IV	19.4059	19.8218	49.5834	88.811
				Daptomycin	19.4059	33.0363	24.7917	77.2339
				Cefazolin IV	9.70296	49.5544	74.375	133.632
				Ceftriaxone IV	9.70296	16.5181	24.7917	51.0128
				Other	0	0	0	0
				Treatment administration costs, outpatient settings
				Infusion Cost (for outpatients)		Cost per hour ($)
				Hourly rate for a nurse ($)		42.5	Source: Statistics Canada 2018 data, inflated to December 2023
				Cost per day of infusion		Hours per day	Cost per infusion ($)	Number of outpatient infusions	Total outpatient cost ($)	Assumption
				Xydalba IV		0.5	21.25	0	0	XYDALBA should be administered over 30 minutes by intravenous infusion
				Vancomycin IV		3.33333	141.667	2.2	311.667	Each dose should be administered at a rate of no more than 10 mg/minute.
				Linezolid IV		2.5	106.25	0	0	Linezolid injection should be administered by intravenous infusion over a period of 30 to 120 minutes.
				Daptomycin		0.5	21.25	0	0	Inject the appropriately diluted reconstituted solution slowly over 3 to 5 minutes.
				Cefazolin IV		0.2	8.5	0	0	Should be given over a period of 20 to 30 minutes in adults.
				Ceftriaxone IV		0.416667	17.7083	0	0	Daptomycin for Injection 4 mg/kg should be administered intravenously, either by injection over a 2-minute period or by infusion over a 30-minute period. A 30 minute period was used.
				Other		0	0	0	0	Placholder
				Note that the pharmacist costs (e.g., dispensing fee) are conservatively excluded from this analysis for simplicity
				Monitoring costs
					Weekly monitoring frequency
					CBC-diff	BMP including K, Cr, Bun	Liver profile: ALT, AST, ALK, Tbil	Vancomycin trough level		Total weekly monitoring cost ($)	Number of inpatient setting monitoring*	Number of outpatient setting monitoring*	Total cost in the inpatient settings ($)	Total cost in the outpatient settings ($)	Total cost ($)
				Xydalba IV	0	0	0	0		0	0	1	0	0	0
				Vancomycin IV	1	1	0	1		31.5833	1	0	63.1665	0	63.1665
				Linezolid IV	1	0	1	0		10.1058	1	0	20.2115	0	20.2115
				Daptomycin	1	1	0	0		15.3918	1	0	30.7837	0	30.7837
				Cefazolin IV	1	1	0	0		15.3918	1	0	30.7837	0	30.7837
				Ceftriaxone IV	1	1	1	0		21.0777	1	0	42.1554	0	42.1554
				Other	0	0	0	0		0	1	0	0	0	0
				Unit cost ($)	4.41988	10.972	5.68587	16.1914
				Source for frequency of monitoring: Norris et al. 2018 IDSA Clinical Practice Guideline for the Management of OPAT
				Source for cost of monitoring: Ministry of Health Ontario Health Insurance Plan. Laboratories and Genetics Branch. Schedule of Benefits for Laboratory Services (Effective July 1, 2020), inflated to December 2023.
				* These are weekly tests, and are assumed to be performed at Day 1 for all patients and at Day 8 for patients who are still treated

## Sheet: Results
				Cost calculator for Xydalba® – Results
				Xydalba is indicated for the treatment of adult patients with acute bacterial skin and skin structure infections (ABSSSI), caused by susceptible isolates of the following gram-positive microorganisms: Staphylococcus aureus (including methicillin-susceptible and methicillin-resistant strains), Streptococcus pyogenes, Streptococcus agalactiae, Streptococcus dysgalactiae, Streptococcus anginosus gro…
				Total cost calculation
				Number of patients to consider in the calculation	1
				Inpatient Settings	IV antibiotic ($)	Subsequent oral antibiotic ($)	Catheter/PICC ($)	Hospital stay ($)	Administration ($)	Monitoring ($)	Total treatment cost per patient ($)	Total cost for all patients considered ($)	Incremental impact* ($)
				Xydalba IV	0	0	0	0	0	0	0	0
				Vancomycin IV	180.298	0	337.425	36385.1	113.441	63.1665	37079.5	37079.5	-37079.5
				Linezolid IV	1242.36	30.222	337.425	36385.1	88.811	20.2115	38104.2	38104.2	-38104.2
				Daptomycin	1036.44	30.222	337.425	36385.1	77.2339	30.7837	37897.2	37897.2	-37897.2
				Cefazolin IV	126	30.222	337.425	36385.1	133.632	30.7837	37043.2	37043.2	-37043.2
				Ceftriaxone IV	174.86	30.222	337.425	36385.1	51.0128	42.1554	37020.8	37020.8	-37020.8
				Other	0	30.222	0	0	0	0	30.222	30.222	-
					*Note: negative incremental impact means that Xydalba generates savings
				Outpatient Settings	IV antibiotic ($)	Subsequent oral antibiotic ($)	Catheter/PICC ($)	Hospital stay ($)	Administration ($)	Monitoring ($)	Total treatment cost per patient ($)	Total cost for all patients considered ($)	Incremental impact* ($)
				Xydalba IV	2871.5	0	0	0	0	0	2871.5	2871.5
				Vancomycin IV	82.6364	30.222	0	0	311.667	0	424.525	424.525	2446.97
				Linezolid IV	0	0	0	0	0	0	0	0	2871.5
				Daptomycin	0	0	0	0	0	0	0	0	2871.5
				Cefazolin IV	0	0	0	0	0	0	0	0	2871.5
				Ceftriaxone IV	0	0	0	0	0	0	0	0	2871.5
				Other	0	0	0	0	0	0	0	0	-
					*Note: negative incremental impact means that Xydalba generates savings
				Total cost	IV antibiotic ($)	Subsequent oral antibiotic ($)	Catheter/PICC ($)	Hospital stay ($)	Administration ($)	Monitoring ($)	Total treatment cost per patient ($)	Total cost for all patients considered ($)	Incremental impact* ($)
				Xydalba IV	2871.5	0	0	0	0	0	2871.5	2871.5
				Vancomycin IV	262.934	30.222	337.425	36385.1	425.108	63.1665	37504	37504	-34632.5
				Linezolid IV	1242.36	30.222	337.425	36385.1	88.811	20.2115	38104.2	38104.2	-35232.7
				Daptomycin	1036.44	30.222	337.425	36385.1	77.2339	30.7837	37897.2	37897.2	-35025.7
				Cefazolin IV	126	30.222	337.425	36385.1	133.632	30.7837	37043.2	37043.2	-34171.7
				Ceftriaxone IV	174.86	30.222	337.425	36385.1	51.0128	42.1554	37020.8	37020.8	-34149.3
				Other	0	30.222	0	0	0	0	30.222	30.222	-
					*Note: negative incremental impact means that Xydalba generates savings

## Sheet: Additional NIHB costs
				Cost calculator for Xydalba® – NIHB
				Xydalba is indicated for the treatment of adult patients with acute bacterial skin and skin structure infections (ABSSSI), caused by susceptible isolates of the following gram-positive microorganisms: Staphylococcus aureus (including methicillin-susceptible and methicillin-resistant strains), Streptococcus pyogenes, Streptococcus agalactiae, Streptococcus dysgalactiae, Streptococcus anginosus gro…
				Additional costs for patients from remote locations
				Transport	% utilisation	Cost
				Cost ($ per flight)	0.1	15720.2	% utilisation: placeholder. Cost: https://www.ncbi.nlm.nih.gov/pmc/articles/PMC3748437/, accessed on 29 January 2024
				Commercial flight (round trip)	0.2	2008	% utilisation: placeholder. Cost: assuming a round trip from Iqaluit to Ottawa $1,004 x 2) (https://www.ca.kayak.com/flight-routes/Iqaluit-YFB/Ottawa-YOW, accessed on 29 January 2024)
				Total cost		1973.62
				Treatment	Include air transport?	Total costs
				Xydalba IV	No	0
				Vancomycin IV	Yes	1973.62
				Linezolid IV	Yes	1973.62
				Daptomycin	Yes	1973.62
				Cefazolin IV	Yes	1973.62
				Ceftriaxone IV	Yes	1973.62
				Other	No	0
				Proportion of patients requiring an escort	0.03	Assumption: 12% of the NIHB population are 65 years old and over. This placeholder would suggest that 25% of them would require a caregiver.
				Proportion of patients with an escort
				Nightly accommodation rate (per night)	150	Assumption
				Meal rates ($)
				One day	17	Medical Transportation Benefit (fnha.ca), accessed on January 2024
				Overnight	68	Medical Transportation Benefit (fnha.ca), accessed on January 2024
				Weekly	283	Medical Transportation Benefit (fnha.ca), accessed on January 2024
				Treatment		Include overnight stay?	Length of stay (in days)	Include meals?	Total costs
				Xydalba IV	No	No	0	No	0
				Vancomycin IV	Yes	Yes	14	Yes	87.528
				Linezolid IV	Yes	Yes	14	Yes	87.528
				Daptomycin	Yes	Yes	14	Yes	87.528
				Cefazolin IV	Yes	Yes	14	Yes	87.528
				Ceftriaxone IV	Yes	Yes	14	Yes	87.528
				Other	No	No	14	No	0
				* When air transport is included, the escort is assumed to be using a commercial flight with the same % utilisation than the patient.
				Results for NIHB patients
				Number of patients considered in the calculation	1
				Inpatient Settings	IV antibiotic ($)	Subsequent oral antibiotic ($)	Catheter/PICC ($)	Hospital stay ($)	Administration ($)	Monitoring ($)	Total treatment cost per patient ($)	Total cost for all patients considered ($)	Incremental impact* ($)
				Xydalba IV	0	0	0	0	0	0	0	0
				Vancomycin IV	180.298	0	337.425	36385.1	113.441	63.1665	37079.5	37079.5	-37079.5
				Linezolid IV	1242.36	30.222	337.425	36385.1	88.811	20.2115	38104.2	38104.2	-38104.2
				Daptomycin	1036.44	30.222	337.425	36385.1	77.2339	30.7837	37897.2	37897.2	-37897.2
				Cefazolin IV	126	30.222	337.425	36385.1	133.632	30.7837	37043.2	37043.2	-37043.2
				Ceftriaxone IV	174.86	30.222	337.425	36385.1	51.0128	42.1554	37020.8	37020.8	-37020.8
				Other	0	30.222	0	0	0	0	30.222	30.222	-
					*Note: negative incremental impact means that Xydalba generates savings
				Outpatient Settings	IV antibiotic ($)	Subsequent oral antibiotic ($)	Catheter/PICC ($)	Hospital stay ($)	Administration ($)	Monitoring ($)	Total treatment cost per patient ($)	Total cost for all patients considered ($)	Incremental impact* ($)
				Xydalba IV	2871.5	0	0	0	0	0	2871.5	2871.5
				Vancomycin IV	82.6364	30.222	0	0	311.667	0	424.525	424.525	2446.97
				Linezolid IV	0	0	0	0	0	0	0	0	2871.5
				Daptomycin	0	0	0	0	0	0	0	0	2871.5
				Cefazolin IV	0	0	0	0	0	0	0	0	2871.5
				Ceftriaxone IV	0	0	0	0	0	0	0	0	2871.5
				Other	0	0	0	0	0	0	0	0	-
					*Note: negative incremental impact means that Xydalba generates savings
				Total cost including NIHB	IV antibiotic ($)	Subsequent oral antibiotic ($)	Catheter/PICC ($)	Hospital stay ($)	Administration ($)	Monitoring ($)	Patient transport ($)	Escort accommodation ($)	Total treatment cost per patient ($)	Total cost for all patients considered ($)	Incremental impact* ($)
				Xydalba IV	2871.5	0	0	0	0	0	0	0	2871.5	2871.5
				Vancomycin IV	262.934	30.222	337.425	36385.1	425.108	63.1665	1973.62	87.528	39565.1	39565.1	-36693.6
				Linezolid IV	1242.36	30.222	337.425	36385.1	88.811	20.2115	1973.62	87.528	40165.3	40165.3	-37293.8
				Daptomycin	1036.44	30.222	337.425	36385.1	77.2339	30.7837	1973.62	87.528	39958.4	39958.4	-37086.9
				Cefazolin IV	126	30.222	337.425	36385.1	133.632	30.7837	1973.62	87.528	39104.3	39104.3	-36232.8
				Ceftriaxone IV	174.86	30.222	337.425	36385.1	51.0128	42.1554	1973.62	87.528	39081.9	39081.9	-36210.4
				Other	0	30.222	0	0	0	0	0	0	30.222	30.222	-
					*Note: negative incremental impact means that Xydalba generates savings

## Sheet: List
Xydalba is treatment of adult patients with acute bacterial skin and skin structure infections (ABSSSI), caused by susceptible isolates of the following gram-positive microorganisms: Staphylococcus aureus (including methicillin-susceptible and methicillin-resistant strains), Streptococcus pyogenes, Streptococcus agalactiae, Streptococcus dysgalactiae, Streptococcus anginosus group (including Stre…
					Xydalba dosage (in mg)
					1	One dose of 1,500 mg			1500
					2	One dose of 1,000 mg and one dose of 500 mg 1 week later			1000
					selection	1	setting_Xyd_dose
					value	One dose of 1,500 mg
Population option					Utilisation of a catheter/PICC line
1	Customised length of stay values				Xydalba IV	FALSE
2	Average length of stay (based on a US published study)				Vancomycin IV	TRUE
3	Hospitalisation for the IV portion of treatment only				Linezolid IV	TRUE
4	Hospitalisation required for the length of antibiotic treatment				Daptomycin	TRUE
5	Ambulatory care delayed				Cefazolin IV	TRUE
selection	4	setting_LoSopt			Ceftriaxone IV	TRUE
value	Hospitalisation required for the length of antibiotic treatment				Other	TRUE
Vancomycin dosage (in mg)
1	1000					Yes
2	2000					No
3	3000
selection	2	setting_Vanco_dose
value	2000
Inputs for monitoring costs
Blood draw cost		10.76	Ministry of Health Ontario Health Insurance Plan. Laboratories and Genetics Branch. Schedule of Benefits for Laboratory Services (Effective July 1, 2020)
CBC-diff		3.98	Ministry of Health Ontario Health Insurance Plan. Laboratories and Genetics Branch. Schedule of Benefits for Laboratory Services (Effective July 1, 2020)
BMP including K, Cr, Bun		9.88	Ministry of Health Ontario Health Insurance Plan. Laboratories and Genetics Branch. Schedule of Benefits for Laboratory Services (Effective July 1, 2020)
Liver profile: ALT, AST, ALK, Tbil		5.12	Ministry of Health Ontario Health Insurance Plan. Laboratories and Genetics Branch. Schedule of Benefits for Laboratory Services (Effective July 1, 2020)
Antibiotic level, serum		14.58	Ministry of Health Ontario Health Insurance Plan. Laboratories and Genetics Branch. Schedule of Benefits for Laboratory Services (Effective July 1, 2020)
BMP= basic metabolic panel (glucose, calcium, bun (blood urea nitrogen), creatinine, sodium, potassium, bicarbonate, chloride)
Glucose	1.28
Calcium	1.16
BUN	1.28
Creatinine	1.28
Sodium	1.16
Potassium	1.16
Bicarbonate	1.28
Chloride	1.28
Liver profile: ALT, AST, ALK, Tbil
ALT	1.28
AST	1.28
ALK	1.28
Tbil	1.28
CPI Canada (Bank of Canada), Total CPI, february of each year, https://www.bankofcanada.ca/rates/price-indexes/cpi/
2009	113.8
2010	115.6
2011	118.1
2012	121.2
2013	122.7
2014	124.1
2015	125.4
2016	127.1
2017	129.7
2018	132.5
2019	134.5
2020	137.4
2021	138.9
2022	146.8
2023	154.5
Statistic Canada, Table 18-10-0004-08, Health care
2008-06-01	112.9
2010-06-01	114.7
2018-06-01	126.3
2020-07-01	132.1
2021-12-01	135
2022-03-01	134.9
2023-12-01	146.7
Population options																																			1
Selected population	Customised values	Average length of stay (based on a US published study)	Hospitalisation for the IV portion of treatment only	Hospitalisation required for the length of antibiotic treatment	Ambulatory care delayed
Definition	Length of stay to be selected by the user	Uses average length of stay based on a US published study	A patient who could be discharged but ambulatory care cannot be organised (e.g., lives in a remote location). Note that the length of IV treatment can be modified in the "Antibiotic costs" section.	A patient who could be discharged but has a high likelihood of non-adherence to outpatient treatment (e.g., homeless, PWID)	A patient who could be discharged but time is needed to organise ambulatory care
Xydalba IV		3.2	0	0	0
Vancomycin IV		4.8	7	14	3
Linezolid IV		4.8	7	14	3
Daptomycin		4.8	7	14	3
Cefazolin IV		4.8	7	14	3
Ceftriaxone IV		4.8	7	14	3
Other		4.8	7	14	3
Source	User must enter the relevant length of stay for each treatment in the "Customised Value" column below	McCarthy et al. 2020 (ENHANCE ABSSSI trial)	Xydalba: no hospitalisation; Comparators: hospital length of stay is set equal to the length of IV treatment	Xydalba: no hospitalisation; Comparators: hospital length of stay is set equal to the length of antibiotic treatment	Xydalba: no hospitalisation; Comparators: assumes hospital discharge is delayed by 3 days
	Weight	Dose	Daily units	Cost/mg	Daily cost
Linezolid PO	0.092	600	2	0.0321735	38.6082	Ontario Drug Benefit Formulary, accessed on January 2024
Clindamycin PO	0.033	375	4	0.001478	2.217	Ontario Drug Benefit Formulary, accessed on January 2024
Cephalexin PO	0.45	500	4	0.0003464	0.6928	Ontario Drug Benefit Formulary, accessed on January 2024
Cloxacillin PO	0.05	375	4	0.0008564	1.2846	Ontario Drug Benefit Formulary, accessed on January 2024
Sulfamethoxazole / Trimethoprim PO	0.208333	1200	2	0.000262583	0.6302	Ontario Drug Benefit Formulary, accessed on January 2024
Clavulin PO	0.166667	875	2	0.0006344	1.1102	Ontario Drug Benefit Formulary, accessed on January 2024
	1				4.31743

## Sheet: Model default 2
				Cost calculator
				Xydalba is treatment of adult patients with acute bacterial skin and skin structure infections (ABSSSI), caused by susceptible isolates of the following gram-positive microorganisms: Staphylococcus aureus (including methicillin-susceptible and methicillin-resistant strains), Streptococcus pyogenes, Streptococcus agalactiae, Streptococcus dysgalactiae, Streptococcus anginosus group (including Stre…
				Additional costs for patients from remote locations
				Transport
				Cost ($ per flight)	0.1	15720.2
				Commercial flight (round trip)	0.2	2008
				Total cost
				Treatment	Include air transport?	Total costs
				Xydalba	No
				Vancomycin IV	Yes
				Linezolid IV	Yes
				Daptomycin	Yes
				Cefazolin IV	Yes
				Ceftriaxone IV	Yes
				Other	No
				Caregiver accommodation and transport	0.03
				Proportion of patients with an accompanying carer
				Nightly accommodationrate (per night)	150
				Meal rates ($)
				One day	17
				Overnight	68
				Weekly	283
				Treatment	Include air transport?	Include overnight stay?	Length of stay (in days)	Include meals?	Total costs
				Xydalba	No	No		No
				Vancomycin IV	Yes	Yes		Yes
				Linezolid IV	Yes	Yes		Yes
				Daptomycin	Yes	Yes		Yes
				Cefazolin IV	Yes	Yes		Yes
				Ceftriaxone IV	Yes	Yes		Yes
				Other	No	No		No
				Results for NIHB patients
				Number of patients considered in the calculation	1

## Sheet: Model default
				Cost calculator
				Xydalba is treatment of adult patients with acute bacterial skin and skin structure infections (ABSSSI), caused by susceptible isolates of the following gram-positive microorganisms: Staphylococcus aureus (including methicillin-susceptible and methicillin-resistant strains), Streptococcus pyogenes, Streptococcus agalactiae, Streptococcus dysgalactiae, Streptococcus anginosus group (including Stre…
				Patient profile / Length of hospital stay
				Select the relevant population scenario
				Selected population scenario	Hospitalisation required for the length of antibiotic treatment
				Definition	A patient who could be discharged but has a high likelihood of non-adherence to outpatient treatment (e.g., homeless, PWID)
				Source / Assumption	Xydalba: no hospitalisation; Comparators: hospital length of stay is set equal to the length of antibiotic treatment
					Length of hospitalisation (days)
				Treatment	Population-based value	Customised value	Selected value
				Xydalba		0
				Vancomycin IV		0
				Linezolid IV		0
				Daptomycin		0
				Cefazolin IV		0
				Ceftriaxone IV		0
				Other		0
				Antibiotic costs
				Xydalba cost per mg	1.91433
				Administration options for Xydalba
					Inpatient settings	Inpatient settings	Total treatment
				Xydalba dosage (in mg)
				Cost of Xydalba ($)
				Total length of antibiotic treatment (Oral and IV combined, Days)	14
				Daily cost of selected comparators	Dose per administration (mg)	Number of administrations per day	Cost / mg ($)	Daily cost ($)	Length of IV treatment (Days)	Length of hospitalisation (Days)	Total inpatient treatment cost ($)1	Total outpatient treatment cost ($)2	Total treatment cost ($)
				Vancomycin IV	1000	2	0.018781		12
				Linezolid IV	600	2	0.1479		12
				Cefazolin IV	1000	3	0.006		12
				Ceftriaxone IV	2000	1	0.01249		12
				Other	0	0	0		12
					Patient's weight (kg)	Daily dose (mg/kg)	Cost / mg ($)	Daily cost ($)	Length of IV treatment (Days)	Length of hospitalisation (Days)	Total inpatient IV treatment cost ($)1	Total outpatient IV treatment cost ($)2	Total treatment cost ($)
				Daptomycin	76	6	0.3247		12
				Cost of subsequent oral antibiotic	Daily cost ($)	Assumption and references
				Oral antibiotic (weighted average)	4.31743	The cost of oral treatment is a weighted average of linezolid PO, clindamycin PO, cephalexin PO, cloxacillin PO, sulfamethoxazole / trimethoprim PO, and amoxicillin / clavulanate potassium PO (weights are based on expert opinion)
				Post-IV oral antibiotic treatments	Inpatient length of oral treatment (Days)	Outpatient length of oral treatment (Days)	Total inpatient treatment cost ($)3	Total outpatient treatment cost ($)4	Total treatment cost ($)
				Post-vancomycin IV oral antibiotics
				Post-linezolid IV oral antibiotics
				Post-cefazolin IV oral antibiotics
				Post-ceftriaxone IV oral antibiotics
				Post-other IV oral antibiotics
				Post-daptomycin IV oral antibiotics
				Catheter or PICC line costs
				Cost of a catheter or PICC line for comparators		% of utilisation	Cost per utilisation ($)
				PICC line		0.9	371.222
				Catheter		0.1	33.25
				Other (e.g., a pump)		0	0
				Total infusion cost		1
				Proportion of the cost incured in the inpatient settings		1
				Total inpatient cost
				Total outpatient cost
				Antibiotics for which a catheter or a PICC line is used
				Xydalba
				Vancomycin IV
				Linezolid IV
				Daptomycin
				Cefazolin IV
				Ceftriaxone IV
				Hospital stay costs
				Cost of hospitalisation		Input	Assumption and references
				Daily cost of hospitalisation ($)		2598.94	CIHI Patient Cost estimator (2014-2018), accessed on 01 July 2021, extrapolated to 2022 using an assumption of a fixed growth rate
				Treatment	Length of stay (Days)	Hospital cost ($)
				Xydalba
				Vancomycin IV
				Linezolid IV
				Daptomycin
				Cefazolin IV
				Ceftriaxone IV
				Source or assumption for length of stay: Xydalba: no hospitalisation; Comparators: hospital length of stay is set equal to the length of antibiotic treatment
				Treatment administration costs, inpatient settings
				Hourly rate for a pharmacist ($)	62.696	Source: Pettigrew et al. 2012, adjusted to 2022
				Hourly rate for a pharmacy assistant technician ($)	28.3168	Source: Pettigrew et al. 2012, adjusted to 2022
				Hourly rate for a nurse ($)	42.5	Source: Statistic Canada extrapolated to 2022
					Minutes spent daily for treatment administration
					Pharmacist		Assistant technician	Nurse time
				Treatment	1st day	Subsequent days	Per day	Per day of administration
				Xydalba	5	-	10	5	Pharmacist and assistant technician time: expert opinion; Nurse time: 5 minutes per administration was assumed
				Vancomycin IV	20	3.33333	20	10	Pharmacist: 20 minutes is considered at Day 1 and 10 minutes every three days converted into minutes per day for subsequent days (expert opinion); Assistant technician: 10 minutes per infusion x 2 infusions (expert opinion); Nurse: 5 minutes per administration was assumed
				Linezolid IV	10	1.42857	6	10	Pharmacist: 10 minutes for the first day (expert opinion) and 10 minutes per week in subsequent days; Assistant technician: 3 minutes per infusion (Pettigrew et al. 2012) x 2 infusions; Nurse time: 5 minutes per administration was assumed
				Daptomycin	10	1.42857	10	5	Pharmacist: 10 minutes at Day 1 (expert opinion) and 10 minutes per week converted into minutes per day for subsequent days; Assistant technician: same as Xydalba (expert opinion); Nurse time: 5 minutes per administration was assumed
				Cefazolin IV	5	0.714286	15	15	Pharmacist: 5 minutes at Day 1 and 5 minutes per week converted into minutes per day for subsequent days; Assistant technician: 5 minutes per administration (expert opinion); Nurse time: 5 minutes per administration was assumed
				Ceftriaxone IV	5	0.714286	5	5	Pharmacist: 5 minutes at Day 1 and 5 minutes per week converted into minutes per day for subsequent days; Assistant technician: 5 minutes per administration (expert opinion); Nurse time: 5 minutes per administration was assumed
				Other	0	0	0	0
					Costs per inpatient stay
				Treatment	Total pharmacist cost ($)	Total assistant technician cost ($)	Total nurse cost ($)	Total inpatient cost ($)
				Xydalba
				Vancomycin IV
				Linezolid IV
				Daptomycin
				Cefazolin IV
				Ceftriaxone IV
				Other
				Treatment administration costs, outpatient settings
				Infusion Cost (for outpatient patients)		Cost per hour ($)
				Hourly rate for a nurse ($)		37.0969
				Cost per day of infusion		Hours per day	Cost per infusion ($)	Number of outpatient infusions	Total outpatient cost ($)	Assumption and references
				Xydalba		0.5				XYDALBA should be administered over 30 minutes by intravenous infusion
				Vancomycin IV		3.33333				Each dose should be administered at a rate of no more than 10 mg/minute.
				Linezolid IV		2.5				Linezolid injection should be administered by intravenous infusion over a period of 30 to 120 minutes.
				Daptomycin		0.5				Inject the appropriately diluted reconstituted solution slowly over 3 to 5 minutes.
				Cefazolin IV		0.2				Should be given over a period of 20 to 30 minutes in adults.
				Ceftriaxone IV		0.416667				Daptomycin for Injection 4 mg/kg should be administered intravenously, either by injection over a 2-minute period or by infusion over a 30-minute period. A 30 minute period was used.
				Other		0
				Note that the pharmacist costs (e.g., dispensing fee) are conservatively excluded from this analysis for simplicity
				Monitoring costs
					Weekly monitoring frequency
					CBC-diff	BMP including K, Cr, Bun	Liver profile: ALT, AST, ALK, Tbil	Vancomycin trough level		Total weekly monitoring cost ($)	Number of inpatient setting monitoring*	Number of inpatient setting monitoring*	Total cost in the inpatient settings ($)	Total cost in the outpatient settings ($)
				Xydalba	0	0	0	0
				Vancomycin IV	1	1	0	1
				Linezolid IV	1	0	1	0
				Daptomycin	1	1	0	0
				Cefazolin IV	1	1	0	0
				Ceftriaxone IV	1	1	1	0
				Other	0	0	0	0
				Unit cost ($)	4.41988	10.972	5.68587	16.1914
				Source for frequency of monitoring: Norris et al. 2018 IDSA Clinical Practice Guideline for the Management of OPAT
				Source for cost of monitoring: Ministry of Health Ontario Health Insurance Plan. Laboratories and Genetics Branch. Schedule of Benefits for Laboratory Services (Effective July 1, 2020)
				* These are weekly tests, and are assumed to be performed at Day 1 for all patients and at Day 8 for patients who are still treated
				Total cost calculation
				Number of patients to consider in the calculation	1

## Sheet: NIHB cost
	Xydalba is treatment of adult patients with acute bacterial skin and skin structure infections (ABSSSI), caused by susceptible isolates of the following gram-positive microorganisms: Staphylococcus aureus (including methicillin-susceptible and methicillin-resistant strains), Streptococcus pyogenes, Streptococcus agalactiae, Streptococcus dysgalactiae, Streptococcus anginosus group (including Stre…
	Transport cost sources
	Medivac transport ($, per flight)	715	Nunavut health minister threatens to forward medical travel bills to Ottawa over lack of negotiations | Nunatsiaq News, 2021													Portion payée par le gouvernement Canadien, ça ne veut pas dire que c'est ça
	Accommodation for 1 caregiver travelling with the patient	$150/day	Did not find this info in the site An environmental scan of emergency response systems and services in remote First Nations communities in Northern Ontario - PMC (nih.gov)
	Meal rates for patients and caregiver
	Day rate	17	Medical Transportation Benefit (fnha.ca)
	Overnight rate	68	Medical Transportation Benefit (fnha.ca)
	Weekly rate	283	Medical Transportation Benefit (fnha.ca)
	Milleage rate (per km)	0.29	Medical Transportation Benefit (fnha.ca)
	First nation health authority	https://www.fnha.ca/Documents/FNHA-Medical-Transportation-Benefits-Schedule.pdf
	Nightly accommodation rates	212.5	Source: https://www.fnha.ca/Documents/FNHA-Medical-Transportation-Benefits-Schedule.pdf accessed on 29 September 2023; varying between $125 and $150, using the middle point.
	Patient transportation fees - Fraser Health Authority	And Islandhealth.ca
	Patient Transportation Fees | Island Health
	Kornelsen et al. BMC Health Services research 2021: out of pocket expensens for patient travel in BC (from rural area)
							Those statistics are interesting but all respondants are from rural locations
